# Supplementary material for: Palliative radiotherapy utilization for cancer patients at end of life in British Columbia: retrospective cohort study
Source: PubMed Central journal article supplement (PMC4240806; doi:10.1186/1472-684x-13-49), 2014-11-18
Supplement: 12904_2014_230_MOESM2_ESM.pdf [file 12904_2014_230_MOESM2_ESM.pdf]

## Appendix B: Definitions of Primary Cancer Diagnosis

| Primary Cancer Site  | ICD-O-3 Site   | ICD-O-3 Site Description                                                                                                                                                                                                                                                         | Histology Code Exclusion                            |  |
|----------------------|----------------|----------------------------------------------------------------------------------------------------------------------------------------------------------------------------------------------------------------------------------------------------------------------------------|-----------------------------------------------------|--|
| <b>Lung</b>          | <b>C34</b>     |                                                                                                                                                                                                                                                                                  | excluding histology code 9590-9989, 9050-9055, 9140 |  |
|                      | C340           | Malignant neoplasm of main bronchus                                                                                                                                                                                                                                              |                                                     |  |
|                      | C341           | Malignant neoplasm upper lobe, bronchus or lung                                                                                                                                                                                                                                  |                                                     |  |
|                      | C343           | Malignant neoplasm lower lobe, bronchus or lung                                                                                                                                                                                                                                  |                                                     |  |
|                      | C348           | Overlapping malignant lesion of bronchus and lung                                                                                                                                                                                                                                |                                                     |  |
|                      | C349           | Malignant neoplasm bronchus or lung unspecified                                                                                                                                                                                                                                  |                                                     |  |
| <b>Colorectal</b>    | <b>C18-C20</b> |                                                                                                                                                                                                                                                                                  |                                                     |  |
|                      | C18            | Malignant neoplasm of colon                                                                                                                                                                                                                                                      |                                                     |  |
|                      | C19            | Malignant neoplasm of recto sigmoid junction                                                                                                                                                                                                                                     |                                                     |  |
|                      | C20            | Malignant neoplasm of rectum                                                                                                                                                                                                                                                     |                                                     |  |
| <b>Prostate</b>      | <b>C61</b>     | <b>Malignant neoplasm of prostate</b>                                                                                                                                                                                                                                            |                                                     |  |
| <b>Breast</b>        | <b>C50</b>     |                                                                                                                                                                                                                                                                                  |                                                     |  |
|                      | C500           | Malignant neoplasm of nipple and areola                                                                                                                                                                                                                                          |                                                     |  |
|                      | C501           | Malignant neoplasm of central portion of breast                                                                                                                                                                                                                                  |                                                     |  |
|                      | C502           | Malignant neoplasm of upper-inner quadrant of breast                                                                                                                                                                                                                             |                                                     |  |
|                      | C503           | Malignant neoplasm of lower-inner quadrant of breast                                                                                                                                                                                                                             |                                                     |  |
|                      | C504           | Malignant neoplasm of upper-outer quadrant of breast                                                                                                                                                                                                                             |                                                     |  |
|                      | C505           | Malignant neoplasm of lower-outer quadrant of breast                                                                                                                                                                                                                             |                                                     |  |
|                      | C506           | Malignant neoplasm of axillary tail of breast                                                                                                                                                                                                                                    |                                                     |  |
|                      | C508           | Overlapping malignant lesion of breast                                                                                                                                                                                                                                           |                                                     |  |
|                      | C509           | Malignant neoplasm breast part unspecified                                                                                                                                                                                                                                       |                                                     |  |
| <b>Brain</b>         | <b>C70-C72</b> |                                                                                                                                                                                                                                                                                  |                                                     |  |
|                      | C70            | Malignant neoplasm of meninges                                                                                                                                                                                                                                                   |                                                     |  |
|                      | C71            | Malignant neoplasm of brain                                                                                                                                                                                                                                                      |                                                     |  |
|                      | C72            | Malignant neoplasm of spinal cord, cranial nerves and other parts of central nervous system                                                                                                                                                                                      |                                                     |  |
| <b>Blood</b>         |                |                                                                                                                                                                                                                                                                                  |                                                     |  |
| Hodgkin Lymphoma     |                | All primary sites with histology codes 9650-9667                                                                                                                                                                                                                                 |                                                     |  |
| Non-Hodgkin Lymphoma |                | All primary sites with histology codes 9590-9596, 9670-9719, 9727-9729<br>histology codes 9823, all sites except C42.0, C42.1, C42.4<br>histology codes 9827, all sites except C42.0, C42.1, C42.4                                                                               |                                                     |  |
| Multiple Myeloma     |                | All primary sites with histology codes 9731, 9732, 9734                                                                                                                                                                                                                          |                                                     |  |
| Leukemia             |                | All primary sites with histology codes 9733, 9742, 9800-9801, 9805, 9820, 9826, 9831-9837, 9840, 9860-9861, 9863, 9866-9867, 9870-9876, 9891, 9895-9897, 9910, 9920, 9930-9931, 9940, 9945-9946, 9948, 9963-9964<br>For sites C42.0, C42.1, C42.4, histology codes 9823 and 9827 |                                                     |  |

| Primary Cancer Site                           | ICD-O-3 Site                             | ICD-O-3 Site Description                                           | Histology Code Exclusion                            |
|-----------------------------------------------|------------------------------------------|--------------------------------------------------------------------|-----------------------------------------------------|
| <b>Other Digestive (excluding colorectal)</b> | <b>C15-C17, C21-C26</b>                  |                                                                    | excluding histology code 9590-9989, 9050-9055, 9140 |
| Esophagus                                     | C15                                      | Malignant neoplasm of oesophagus                                   |                                                     |
| Stomach                                       | C16                                      | Malignant neoplasm of stomach                                      |                                                     |
| Small intestine                               | C17                                      | Malignant neoplasm of small intestine                              |                                                     |
| Anus and anal canal                           | C21                                      | Malignant neoplasm of anus and anal canal                          |                                                     |
| liver                                         | C22                                      | Malignant neoplasm of liver and intrahepatic bile ducts            |                                                     |
| Gallbladder                                   | C23                                      | Malignant neoplasm of gallbladder                                  |                                                     |
| Other and unspecified parts of biliary tract  | C24                                      | Malignant neoplasm of other and unspecified parts of biliary tract |                                                     |
| Pancreas                                      | C25                                      | Malignant neoplasm of pancreas                                     |                                                     |
| Intestinal tract                              | C26                                      | Malignant neoplasm of other and ill-defined digestive organs       |                                                     |
| <b>Skin - Melanoma</b>                        | <b>C44 and histology codes 8720-8790</b> |                                                                    |                                                     |
|                                               | C44                                      | Other malignant neoplasms of skin                                  |                                                     |
| <b>Urinary</b>                                | <b>C64-C68</b>                           |                                                                    | excluding histology code 9590-9989, 9050-9055, 9140 |
| Kidney                                        | C64                                      | Malignant neoplasm of kidney, except renal pelvis                  |                                                     |
| Kidney - renal pelvis                         | C65                                      | Malignant neoplasm of renal pelvis                                 |                                                     |
| Ureter                                        | C66                                      | Malignant neoplasm of ureter                                       |                                                     |
| Bladder                                       | C67                                      | Malignant neoplasm of bladder                                      |                                                     |
| Other and unspecified urinary organs          | C68                                      | Malignant neoplasm of other and unspecified urinary organs         |                                                     |
| <b>Female genital</b>                         | <b>C51-C58</b>                           |                                                                    |                                                     |
| Vulva                                         | C51                                      | Malignant neoplasm of vulva                                        |                                                     |
| Vagina                                        | C52                                      | Malignant neoplasm of vagina                                       |                                                     |
| Cervix                                        | C53                                      | Malignant neoplasm of cervix uteri                                 |                                                     |
| Body of Uterus                                | C54                                      | Malignant neoplasm of corpus uteri                                 |                                                     |
|                                               | C55                                      | Malignant neoplasm of uterus, part unspecified                     |                                                     |
| Ovary                                         | C56                                      | Malignant neoplasm of ovary                                        |                                                     |
|                                               | C57                                      | Malignant neoplasm of other and unspecified female genital organs  |                                                     |
|                                               | C58                                      | Malignant neoplasm of placenta                                     |                                                     |
